# Supplementary material
Source: PubMed Central journal article supplement (PMC2836668)
Supplement: 0909896107_pnas.200909896SI.pdf [file 0909896107_pnas.200909896SI.pdf]

# Supporting Information

Kim et al. 10.1073/pnas.0909896107

## SI Methods

**Identification of microRNAs Whose Expression Is Driven by Copy-Number Alteration.** Array comparative genomic hybridization (aCGH) measures DNA copy-number alterations. The aCGH, microRNA, and mRNA data were obtained from the recently published Cancer Genome Atlas (TCGA) data for glioblastoma (<http://cancergenome.nih.gov/dataportal/>). For quality control, we excluded samples in which the maximal percentage of necrosis was >40% or the maximal normal tissue percentage was >90%. When a sample had more than one portion, only one of the portions was selected for each patient. To identify miRNAs whose expression is driven by copy-number alteration, we performed correlation analysis between miRNA expression and copy-number log ratios across patients for each miRNA. A total of 176 samples having both aCGH and miRNA data available were used for this analysis. To avoid undue influence of outliers, we also computed the Spearman rank correlation coefficient. A list of top-ranked miRNAs are presented in [Table S1](#).

Some high correlation coefficients were derived by copy-number deletion at the genome location of the miRNAs. Because we were interested in miRNAs that are overexpressed because of high copy-number amplification, we focused on the three miRNAs that are overexpressed due to copy-number amplification: miR-26a, miR-339, and miR-148a. The aCGH segment  $\log_2$  values at the genome location of miR-339 and miR-148a were generally in the range of (0, 1), whereas the  $\log_2$  values were much higher for miR-26a (i.e., aCGH segment  $\log_2$  value at the miR-26 location >1.0 for many samples). Therefore, we chose miR-26a for further study. Whereas the correlation coefficient for miR-26a is high and significant, lack of stronger correlation can be attributed to several factors, including experimental noise and the presence of two host genes for hsa-miR-26a (CTDSPL on chromosome 3 and CTDSP2 on chromosome 12).

**Correlation of Expression Profiles for miR-26a, CENTG1, CDK4, and CTDSP2.** We investigated the relationship between the expression of miR-26a and the mRNA abundance of CENTG1, CDK4, and CTDSP2. Data analyses were performed with MATLAB (2009, The Mathworks) and the R software program (<http://www.R-project.org>). Pearson's correlation between miR-26a and these genes was significant:  $\text{corr}(\text{miR-26a}, \text{CENTG1}) = 0.39$  with  $P$  value  $<1 \times 10^{-6}$ ,  $\text{corr}(\text{miR-26a}, \text{CDK4}) = 0.51$  with  $P$  value  $<1 \times 10^{-6}$ , and  $\text{corr}(\text{miR-26a}, \text{CTDSP2}) = 0.68$  with  $P$  value  $<1 \times 10^{-6}$ , where CTDSP2 is a host gene of miR-26a. These correlations can be explained by coamplification of these elements for a number of samples. The correlations between genes were also significant; i.e.,  $\text{corr}(\text{CENTG1}, \text{CDK4}) = 0.65$  with  $P$  value  $<1 \times 10^{-6}$ ,  $\text{corr}(\text{CENTG1}, \text{CTDSP2}) = 0.51$  with  $P$  value  $<1 \times 10^{-6}$ , and  $\text{corr}(\text{CDK4}, \text{CTDSP2}) = 0.57$  with  $P$  value  $<1 \times 10^{-6}$ .

**Accurate Identification of microRNA Targets by Integrative Analysis.** There are several state-of-the-art microRNA target prediction algorithms, including miRanda (1), miRBase (2), and TargetScan (3). These algorithms are primarily based upon the strength of predicted binding between microRNA and the 3'-UTR sequence of the target messenger RNAs. However, tissue-specific miRNA targets cannot be predicted accurately by binding energy calculation alone.

In our work, we took advantage of the multiplatform TCGA data set to investigate the downstream effects of miR-26a overexpression in glioblastoma. Most importantly, correlation between miR-26a expression and mRNA expression of its targets was used to

capture the downstream effects of miR-26a. However, mRNA expression of the targets depends not only on miR-26a but also on DNA copy number alterations and DNA methylation that affect many genes in cancer. Thus, when we computed Pearson's correlation coefficient between the miR-26a expression profile and an mRNA expression profile, we excluded samples that fit the following criteria: (i) DNA copy number at the mRNA genomic location is amplified or deleted (i.e.,  $\text{lsegment value} > 0.3$ ), (ii) DNA methylation occurs at CpG islands near the mRNA genomic location (DNA methylation beta value  $> 0.2$ ), (iii) maximal necrosis percentage  $> 40\%$ , and (iv) maximal normal percentage  $> 90\%$ .

We next selected for further analysis those genes whose mRNA expression was inversely correlated ( $\text{corr} < -0.15$ ) with miR-26a expression after computing Pearson's correlation coefficients for all available genes in the Agilent 244K Custom Gene Expression platform. The predicted target genes of the transcription factors regulating expression of the miR-26a host gene (CTDSP2) were also filtered out. In addition, complementary binding sites between the miR-26a sequence and the 3'-UTR sequences of candidate mRNAs were identified by RNAup (4, 5). Using this tissue-specific approach, a total of 961 candidate miR-26a target transcripts were identified ([Table S2](#)).

We next searched for genes related to key GBM-related pathways among the remaining genes. PTEN and RB1 were selected for biological validation because they are tumor suppressors that play an important role in GBM. MAP3K2 (mitogen-activated protein kinase kinase kinase 2, alias MEKK2, MEKK2B) was also selected because it can activate JNK (6), and JNK activation can promote apoptosis in human glioblastoma cells (7). The total binding energies between the miR-26a sequence and the 3'-UTR sequences of PTEN, MAP3K2, and RB1 were  $-11.79$ ,  $-10.7$ , and  $-8.95$ , respectively. We do not claim that these are direct targets of miR-26a on the basis of these computed binding energies. Instead, we investigated the net effect of elevated miR-26a expression regardless of direct binding. The correlation coefficients for PTEN, MAP3K2, and RB1 were  $-0.38$ ,  $-0.17$ , and  $-0.19$ , respectively, and their  $P$  values were all  $< 0.05$ . We also checked to see whether these three genes could be captured if we did not use the selection criteria (i.e.,  $\text{lsegment value} > 0.3$  and DNA methylation beta value  $> 0.2$ ) for computing Pearson's correlation coefficients between miR-26 expression and each mRNA expression. When we did not use the sample selection filters, the correlation coefficients for PTEN, MAP3K2, and RB1 were  $-0.14$ ,  $-0.17$ , and  $-0.05$ , respectively; more specifically, the coefficients for PTEN and RB1 were  $> -0.15$  and their  $P$  values were not statistically significant ( $> 0.05$ ). Thus, PTEN and RB1 could be found only after we used the sample selection filters described.

**Survival Analysis.** One hundred and seventy eight samples that had both copy number and clinical data were used for survival analysis. To test the correlation between copy-number amplification of the genomic location of miR-26a, CENTG1, or CDK4 and patient survival, we performed log-rank tests between two groups (the first group consisted of samples with high copy-number amplification (aCGH  $\log_2$  value  $> 2.0$ ) and the second group consisted of samples without high copy number (aCGH  $\log_2$  value  $\leq 2.0$ ). For example, miR-26a had 17 samples with high copy-number amplification and 161 samples without. The  $P$  value for the null hypothesis that these two groups belong to the same group was 0.0233. The median survival for the two groups was 209 days and 383 days, respectively. That is, when the genomic location of miR-26a is highly amplified, the median survival is substantially

shorter. Table S3 shows a total of 23 samples whose genome locations of miR-26, CENTG1, or CDK4 were highly amplified. Fig. 1A illustrates 32 samples that were highly amplified within this genome location. For survival analysis, we excluded samples of which survival was <30 days (such a short survival could be for other reasons such as postoperative complications from the surgery). The data in Table S3 show that CDK4 was highly amplified whenever miR-26a was highly amplified. Whenever miR-26a was highly amplified, CENTG1 was also highly amplified except for one sample (06-0177).

**EGFP and Luciferase Reporter Assays.** *EGFP fluorescent reporter assay.* miR-26a binding sites in the 3'-UTRs of *PTEN*, *RBI*, and *MEKK2* were identified using a publicly available microRNA target prediction program ([www.microrna.org](http://www.microrna.org)). PCR primers flanking the miR-26a binding sites were designed and RT-PCR was performed using total mammalian mRNA to generate cDNA fragments for the 3'-UTRs of *PTEN*, *RBI*, and *MEKK2*. The correct sequences were verified by direct DNA sequencing of the cloned fragments. These fragments were then subcloned into the pGEM-T Easy vector and subsequently inserted into pEGFP-C2 to generate green fluorescent protein (EGFP) fused to the 3'-UTRs of *PTEN*, *RBI*, or *MEKK2*. Human 293T cells were transfected with these constructs or with control constructs containing only EGFP. After 24 h, the transfected cells were plated into separate wells, thus ensuring equivalent transfection efficiency across experimental groups. The cells were subsequently exposed to a miR-26a mimic or a control miR-26a oligonucleotide (100 nM, Dharmacon). After an additional 24 h, the cells were fixed, stained with DAPI to label nuclei, and viewed under epifluorescence. Automated image analysis was performed using a publicly available image analysis software ([rsbweb.nih.gov/ij/](http://rsbweb.nih.gov/ij/)). The percentage of cells expressing GFP above a preset threshold level of 100 was determined for cultures exposed to miR-26a mimic or controls. Experiments were repeated in triplicate. Statistical significance was determined by unpaired *t* test. Data shown are mean  $\pm$  SEM. The 3'-UTRs of *PTEN* ( $P < 0.031$ ), *RBI* ( $P < 0.038$ ), and *MAP3K2/MEKK2* ( $P < 0.0001$ ) conferred suppression of EGFP fusion protein expression by the miR-26a mimic.

*Luciferase reporter assay.* As an alternative to the GFP-fusion protein reporter assays described above, luciferase reporter assays were also performed. RT-PCR was used to clone the 3'-UTR cDNA fragments for *RBI* and *MEKK2* into the pMIR-reporter luciferase vector (Applied Biosystems) to generate luciferase fused to the 3'-UTR of *RBI* and *MEKK2*. 293T cells were then transfected with these constructs or a control luciferase construct. A  $\beta$ -galactosidase vector was cotransfected to facilitate normalization for differences in transfection efficiency. After 24 h, the cells were exposed to either miR-26a mimic or miR-26a control oligonucleotides (100 nM). After an additional 24 h, the cells were lysed and luminescence was detected using a luminometer according to the manufacturer's protocol. Between four and eight wells were run for each condition. Experiments were repeated in triplicate. Data shown are mean  $\pm$  SEM. The 3'-UTRs of *RBI* and *MAP3K2/MEKK2* conferred suppression of luciferase activity by the miR-26a mimic.

**In Vitro Growth and Proliferation Assays.** *CCK-8 and MTT cell growth assays.* A total of  $1 \times 10^3$  GBM cells were plated into 96-well culture plates in triplicate, and cell growth was determined daily for 6 days using a tetrazolium salt-based colorimetric assay (Dojindo Molecular Technologies) according to the manufacturer's protocol.

The MTT cell growth assay was also used. LN229 or U87 GBM cells were plated in 96-well plates ( $1 \times 10^4$  cells/well) and maintained in serum-supplemented medium. MTT was added to the cultures and incubated at 37°C for 4 h. MTT reaction product was measured at 590 nm according to the manufacturer's instructions. Eight wells were run for each condition, and the mean and SD were calculated. To account for differences in plating density, the results were normalized using MTT values obtained around the time of first plating. Data were analyzed by *t* test.

*BrdU proliferation assay.* Quantitative measurement of DNA synthesis was performed using a bromo-deoxyuridine (BrdU) ELISA (Roche Applied Science). Briefly, GBM cells were plated at a density of  $1 \times 10^4$  cells/well in 96-well plates. BrdU was added to the medium at a final concentration of 10  $\mu$ M, and the cells were incubated for an additional 1 h. Newly synthesized BrdU-DNA was then assayed using colorimetric detection. Eight wells were run for each condition, and the mean and SD were calculated. In other experiments, BrdU incorporation into DNA was visualized using immunohistochemistry, and cell counts of DAPI-labeled nuclei were performed. Data were analyzed by *t* test.

*Annexin V and live cell/dead cell apoptosis assays.* Cultured U87 or LN229 GBM cells were plated at a density of  $1 \times 10^4$  cells/well in 96-well plates and pretreated as indicated. To induce apoptosis, the cells were exposed overnight to camptothecin (50  $\mu$ M) or to vehicle control. In some experiments, cells were exposed to the specific JNK inhibitor SP600125 (50  $\mu$ M) or to a control inhibitor before camptothecin exposure. Annexin V-alexa 568 was then added to the cultures for 15 min, washed, and visualized according to the manufacturer's instructions.

For live cell/dead cell assays, cell viability was assayed using a commercially available kit (Invitrogen-Molecular Probes) that is based upon the accumulation of calcein acetomethoxy (AM) in the cytoplasm of healthy cells and ethidium homodimer-1 in the nuclei of dead cells. Direct cell counts were made under epifluorescence and the data were analyzed by *t* test.

**Intracranial GBM Growth Assay.** Human U87 GBM cells were first transduced with a lentivirus to generate a stable cell line expressing firefly luciferase. These cells were then transduced with a miR-26a lentivirus or a control virus and were subsequently transplanted ( $2 \times 10^5$  cells/animal) into the frontal cortex of nude mice ( $n = 10$  animals/group). The animals were then followed for  $\approx 4$  weeks. Intracranial tumor growth was imaged noninvasively at periodic time points following intraperitoneal administration of luciferin substrate using a Xenogen camera. The mean of eight to ten luminescence measurements was calculated for each tumor at each time point. The mean and SEM of the data from the animals in each group were calculated for each time point. Statistical significance was determined using the unpaired *t* test.

1. Betel D, Wilson M, Gabow A, Marks DS, Sander C (2008) The microRNA.org resource: Targets and expression. *Nucleic Acids Res* 36 (Database issue):D149–D153.
2. Griffiths-Jones S, Saini HK, van Dongen S, Enright AJ (2008) miRBase: Tools for microRNA genomics. *Nucleic Acids Res* 36 (Database issue):D154–D158.
3. Lewis BP, Shih IH, Jones-Rhoades MW, Bartel DP, Burge CB (2003) Prediction of mammalian microRNA targets. *Cell* 115:787–798.
4. Gruber AR, Lorenz R, Bernhart SH, Neuböck R, Hofacker IL (2008) The Vienna RNA websuite. *Nucleic Acids Res* 36:W70–W74.

5. Mückstein U, et al. (2006) Thermodynamics of RNA-RNA binding. *Bioinformatics* 22: 1177–1182.
6. Su B, Cheng J, Yang J, Guo Z (2001) MEKK2 is required for T-cell receptor signals in JNK activation and interleukin-2 gene expression. *J Biol Chem* 276:14784–14790.
7. Li L, et al. (2008) Glioma pathogenesis-related protein 1 exerts tumor suppressor activities through proapoptotic reactive oxygen species-c-Jun-NH2 kinase signaling. *Cancer Res* 68:434–443.







## Other Supporting Information Files

[Table S1 \(DOC\)](#)

[Table S2 \(DOC\)](#)

[Table S3 \(DOC\)](#)
